# Supplementary material for: Manganese–nickel bimetallic oxide electrocatalyzing redox reactions of lithium polysulfides in lithium–sulfur batteries
Source: Royal Society of Chemistry journal article supplement (doi:10.1039/d1se01987b), 2022-01-01
Supplement: d1se01987b1.pdf [file d1se01987b1.pdf]

## Supporting Information

### **Manganese-nickel bimetallic oxide electrocatalyzing redox reactions of lithium polysulfide in lithium-sulfur batteries**

Yu Si,<sup>ab</sup> Jizong Zhang,<sup>ab</sup> Qiumi Huang,<sup>ab</sup> Jianghai Wei,<sup>ab</sup> Chengyang Wang,<sup>ab</sup> Kemeng Ji<sup>ab</sup> and Mingming Chen<sup>\*ab</sup>

*a. Key Laboratory for Green Chemical Technology of MOE, School of Chemical engineering and Technology, Tianjin University, Tianjin 300072, P. R. China. Email: chmm@tju.edu.cn.*

*b. Collaborative Innovation Center of Chemical Science and Engineering (Tianjin), Tianjin University, Tianjin 300072, P. R. China.*

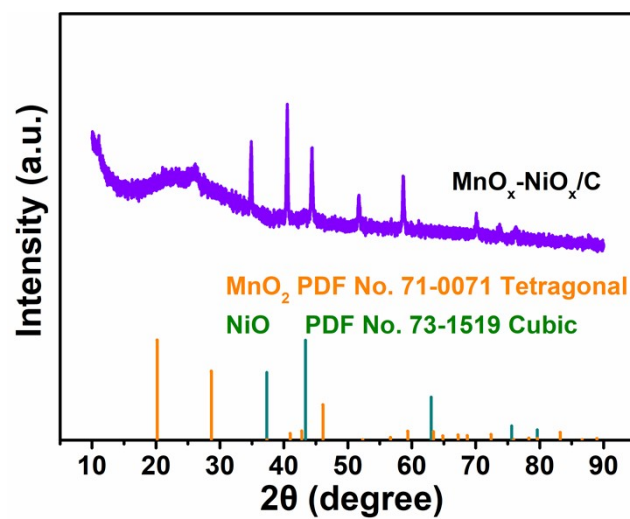

Figure S1 XRD pattern of  $\text{MnO}_x\text{-NiO}_x/\text{C}$ .

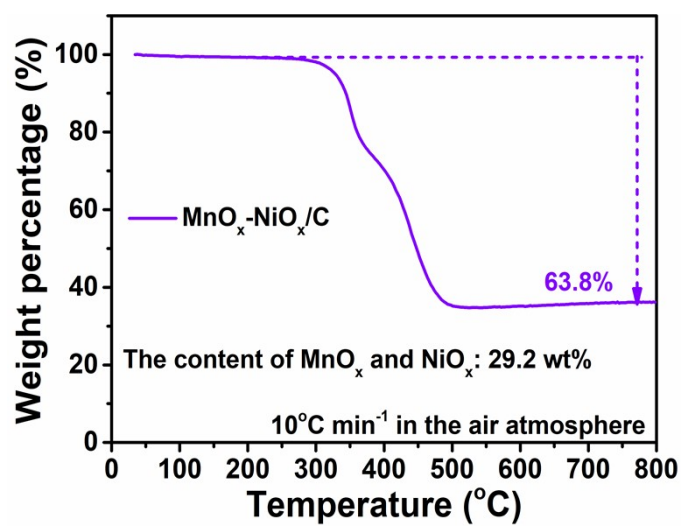

Figure S2 TGA curve of  $\text{MnO}_x\text{-NiO}_x/\text{C}$ .

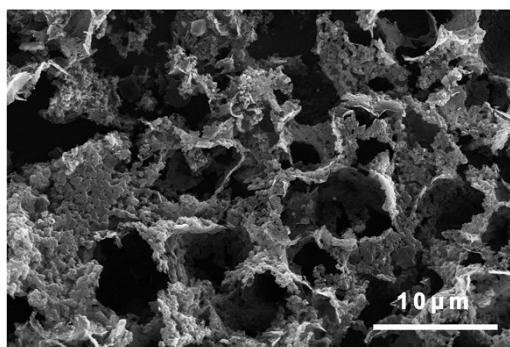

Figure S3 SEM image of  $\text{MnO}_x\text{-NiO}_x/\text{C}$ .

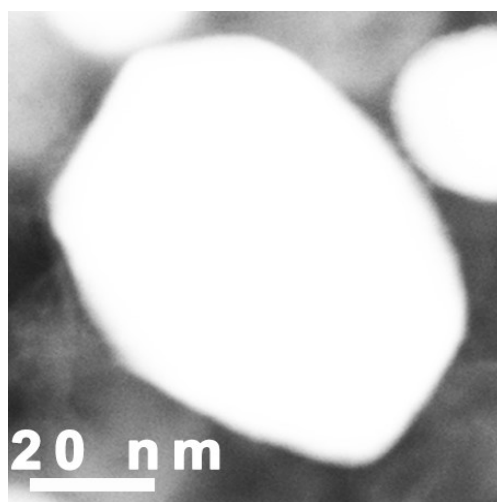

Figure S4 Bright field TEM image of  $\text{MnO}_x\text{-NiO}_x/\text{C}$ .

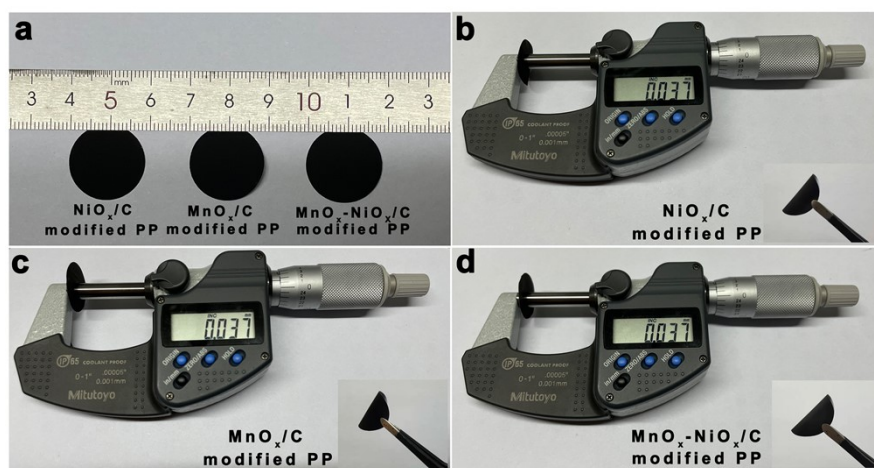

Figure S5. (a) The optical photographs of  $\text{NiO}_x/\text{C}$  modified PP separator,  $\text{MnO}_x/\text{C}$  modified PP separator and  $\text{MnO}_x\text{-NiO}_x/\text{C}$  modified PP separator. The thickness testing and flexibility show (as the insert) of (b)  $\text{NiO}_x/\text{C}$  modified PP separator, (c)  $\text{MnO}_x/\text{C}$  modified PP separator and (d)  $\text{MnO}_x\text{-NiO}_x/\text{C}$  modified PP separator.

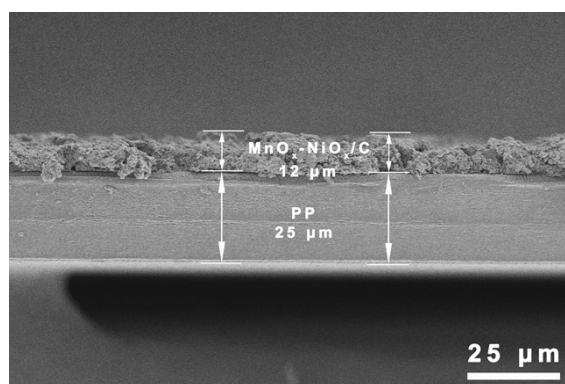

Figure S6 The cross-sectional SEM image of PP separator modified by  $\text{MnO}_x\text{-NiO}_x/\text{C}$ .

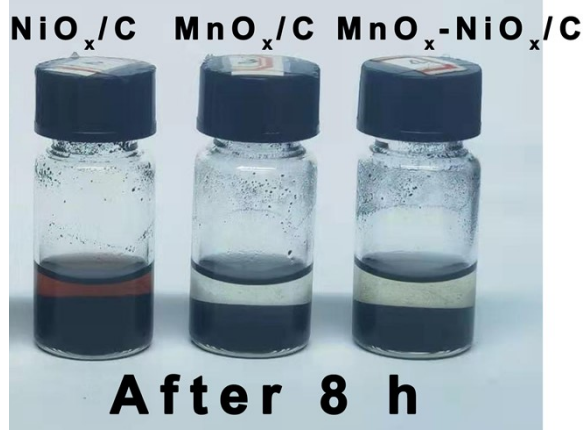

Figure S7 The photograph of color comparison of  $\text{Li}_2\text{S}_8$  solution after adding  $\text{NiO}_x/\text{C}$ ,  $\text{MnO}_x/\text{C}$  and  $\text{MnO}_x\text{-NiO}_x/\text{C}$  for 8 h.

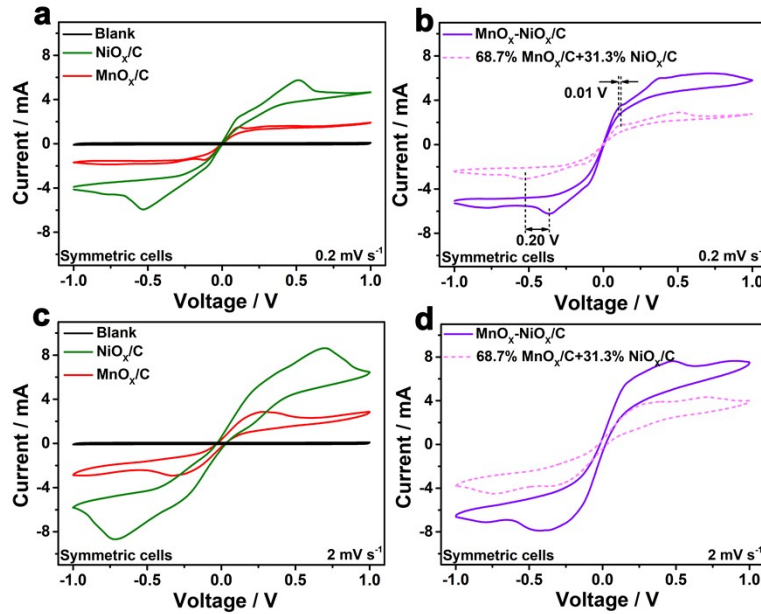

Figure S8. (a) CV curves of the symmetric cells with  $\text{NiO}_x/\text{C}$  electrodes and  $\text{MnO}_x/\text{C}$  electrodes using  $\text{Li}_2\text{S}_8$  electrolyte or  $\text{Li}_2\text{S}_8$ -free electrolyte at a scan rate of  $0.2 \text{ mV s}^{-1}$ . (b) CV curves of the symmetric cells with  $\text{MnO}_x\text{-NiO}_x/\text{C}$  electrodes using  $\text{Li}_2\text{S}_8$  electrolyte or  $\text{Li}_2\text{S}_8$ -free electrolyte at a scan rate of  $0.2 \text{ mV s}^{-1}$  and the CV curve obtained by calculation and simulation according to the CV curve in Figure S8a and the ICP results in Table S1. (c) CV curves of the symmetric cells with  $\text{NiO}_x/\text{C}$  electrodes and  $\text{MnO}_x/\text{C}$  electrodes using  $\text{Li}_2\text{S}_8$  electrolyte or  $\text{Li}_2\text{S}_8$ -free electrolyte at a scan rate of  $2 \text{ mV s}^{-1}$ . (d) CV curves of the symmetric cells with  $\text{MnO}_x\text{-NiO}_x/\text{C}$  electrodes using  $\text{Li}_2\text{S}_8$  electrolyte or  $\text{Li}_2\text{S}_8$ -free electrolyte at a scan rate of  $2.0 \text{ mV s}^{-1}$  and the CV curve obtained by calculation and simulation according to the CV curve in Figure S8c and the ICP results in Table S1.

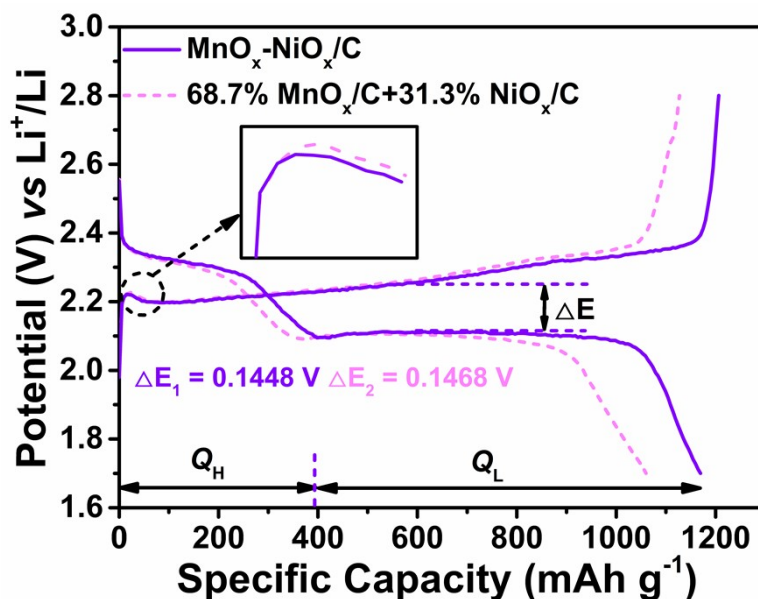

Figure S9 Galvanostatic charge-discharge profile of the cell with  $\text{MnO}_x\text{-NiO}_x/\text{C}$  modified PP separator at  $0.39 \text{ mA cm}^{-2}$  at  $E/S = 23 \text{ } \mu\text{L mg}^{-1}$ , comparing to a calculated result (dotted line in pink) based on galvanostatic charge-discharge profiles of  $\text{NiO}_x/\text{C}$  modified PP cell and  $\text{MnO}_x/\text{C}$  modified PP cell.

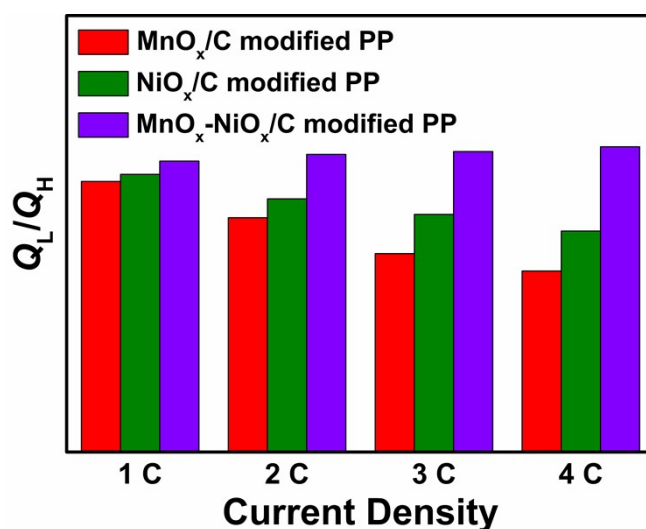

Figure S10 The  $Q_L/Q_H$  ratio at different current densities of cells with  $\text{NiO}_x/\text{C}$ ,  $\text{MnO}_x/\text{C}$  and  $\text{MnO}_x\text{-NiO}_x/\text{C}$  modified PP separators at  $E/S = 23 \text{ } \mu\text{L mg}^{-1}$ .

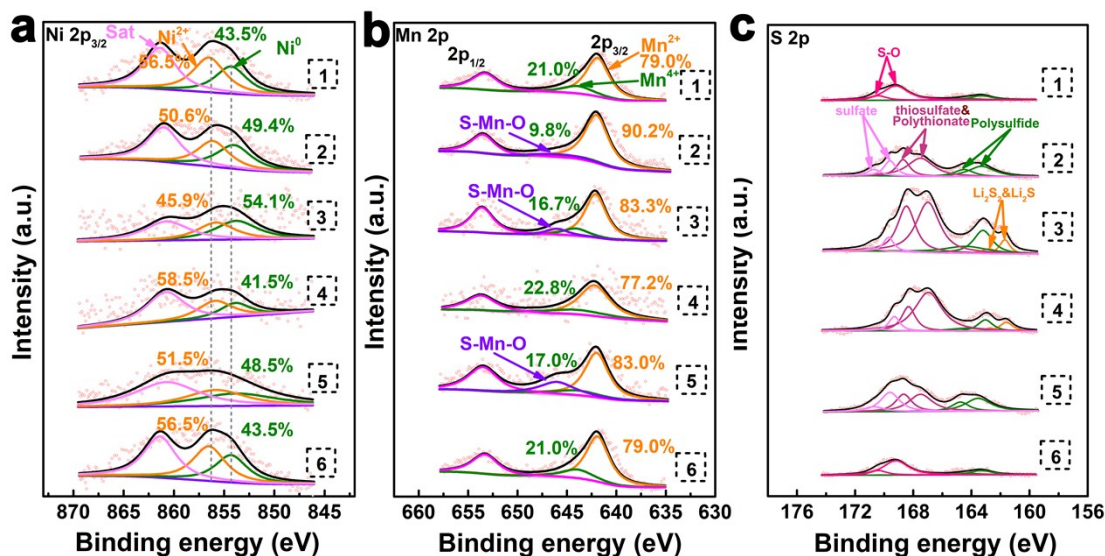

Figure S11. XPS spectras of (a) Ni 2p, (b) Mn 2p and (c) S 2p of  $\text{MnO}_x\text{-NiO}_x/\text{C}$  modified PP separator of cells during different discharging/charging stages.

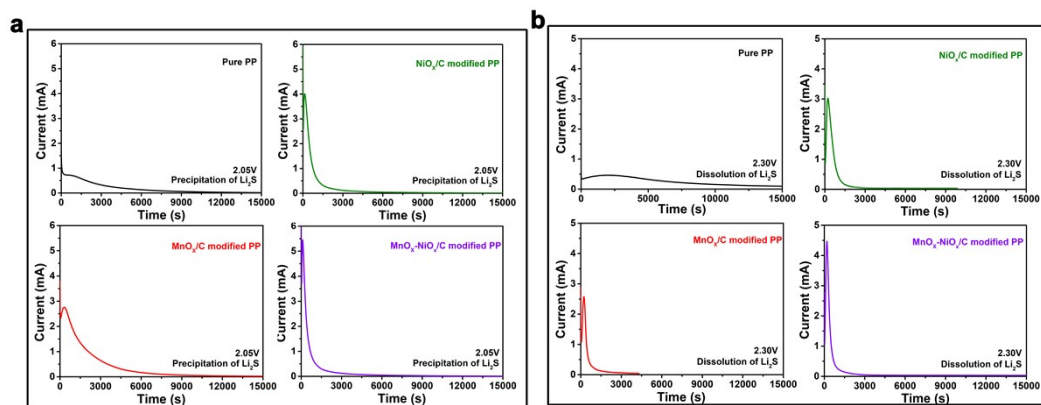

Figure S12. (a) Potentiostatic discharge profile at 2.05 V of cells with Pure PP,  $\text{NiO}_x/\text{C}$ ,  $\text{MnO}_x/\text{C}$  and  $\text{MnO}_x\text{-NiO}_x/\text{C}$  modified PP separators for evaluating precipitation kinetics of  $\text{Li}_2\text{S}$  with  $\text{Li}_2\text{S}_8$  catholyte. (b) Potentiostatic charge profiles at 2.30 V of cells with Pure PP,  $\text{NiO}_x/\text{C}$ ,  $\text{MnO}_x/\text{C}$  and  $\text{MnO}_x\text{-NiO}_x/\text{C}$  modified PP separators for evaluating dissolution kinetics of  $\text{Li}_2\text{S}$  with  $\text{Li}_2\text{S}_8$  catholyte.



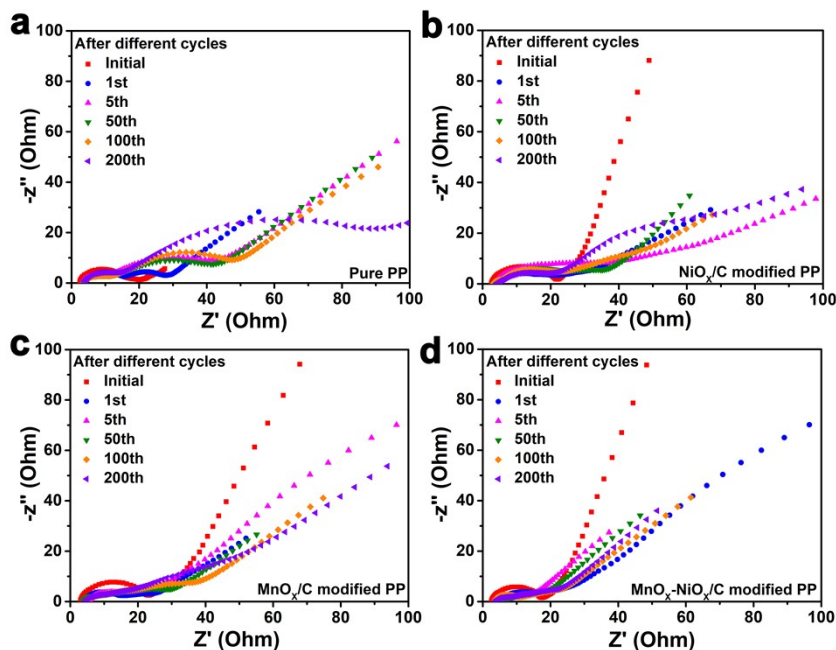

Figure S13. Electrochemical impedance spectra (EIS) of cells with (a) Pure PP, (b)  $\text{NiO}_x/\text{C}$ , (c)  $\text{MnO}_x/\text{C}$ , and (d)  $\text{MnO}_x\text{-NiO}_x/\text{C}$  modified PP separators after different cycles (1 C).

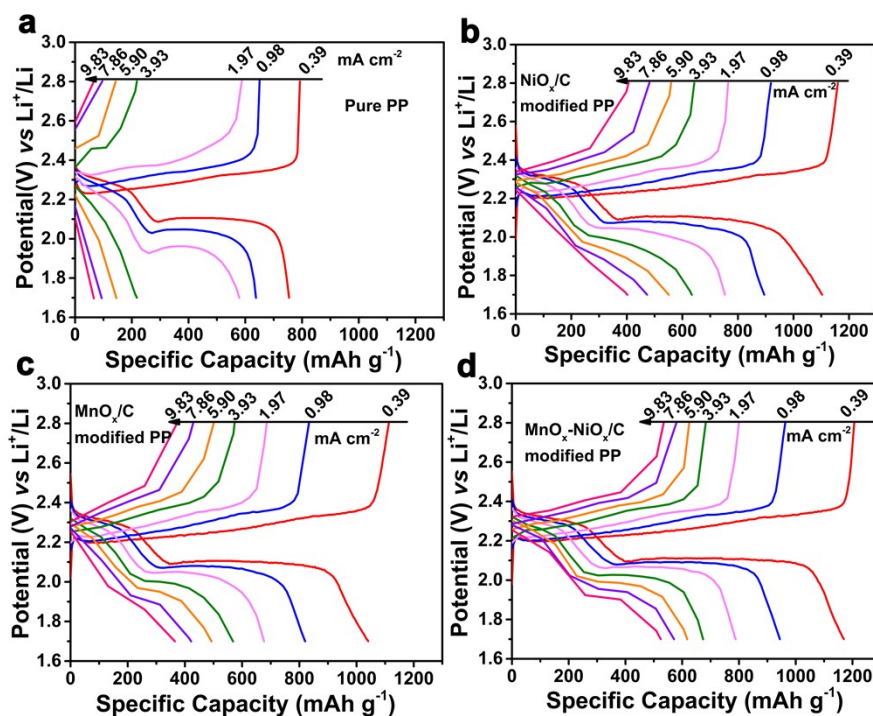

Figure S14. Galvanostatic charge-discharge profiles of cells with separator of (a) Pure PP, (b)  $\text{NiO}_x/\text{C}$  modified PP, (c)  $\text{MnO}_x/\text{C}$  modified PP and (d)  $\text{MnO}_x\text{-NiO}_x/\text{C}$  modified PP at different current densities at  $\text{E/S} = 23 \mu\text{L mg}^{-1}$ .

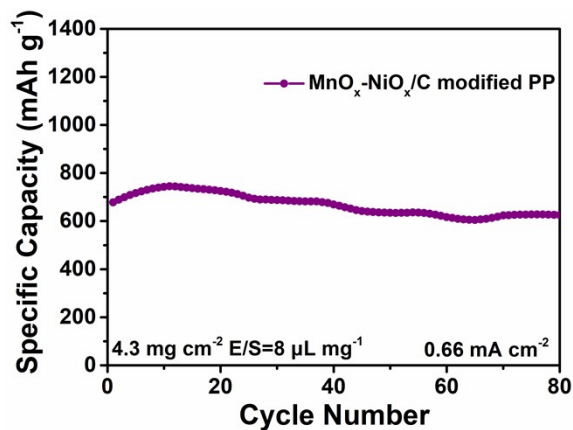

Figure S15. Cycling performance of cell with  $\text{MnO}_x\text{-NiO}_x/\text{C}$  modified PP separator at  $0.66 \text{ mA cm}^{-2}$  with a sulfur loading of  $4.3 \text{ mg cm}^{-2}$  at  $E/S = 8 \text{ } \mu\text{L mg}^{-1}$ .

Table S1 ICP analysis of  $\text{MnO}_x\text{-NiO}_x/\text{C}$ .

| Sample                               | The mass concentration   |                          | Molar ratio of Mn to Ni |
|--------------------------------------|--------------------------|--------------------------|-------------------------|
|                                      | Mn                       | Ni                       |                         |
| $\text{MnO}_x\text{-NiO}_x/\text{C}$ | $32.8 \text{ mg L}^{-1}$ | $15.8 \text{ mg L}^{-1}$ | 2.2 : 1                 |

Table S2 The fitting EIS results of cells with Pure PP,  $\text{NiO}_x/\text{C}$ ,  $\text{MnO}_x/\text{C}$  and  $\text{MnO}_x\text{-NiO}_x/\text{C}$  modified PP separators after 200<sup>th</sup> discharging (1 C).

| Modified cells                                   | 200 <sup>th</sup> discharging $R_{\text{SEI}}/\Omega$ | 200 <sup>th</sup> discharging $R_{\text{ct}}/\Omega$ |
|--------------------------------------------------|-------------------------------------------------------|------------------------------------------------------|
| Pure PP                                          | 27.6                                                  | 110.2                                                |
| $\text{NiO}_x/\text{C}$ modified PP              | 21.2                                                  | 78.1                                                 |
| $\text{MnO}_x/\text{C}$ modified PP              | 23.2                                                  | 95.6                                                 |
| $\text{MnO}_x\text{-NiO}_x/\text{C}$ modified PP | 12.6                                                  | 39.8                                                 |
